# Supplementary material for: Impact of Foodborne Disease in Taiwan during the COVID-19 Pandemic
Source: MDPI journal article supplement (doi:10.3390/medicina60030505), 2024-03-19
Supplement: s1 [file s1]

Table S1. The events of place in foodborne disease during 2019-2020 in Taiwan.

| Places                      | 2019<br>FBD events<br>( <i>n</i> =502) | 2020<br>FBD events<br>( <i>n</i> =506) | <i>p</i> |
|-----------------------------|----------------------------------------|----------------------------------------|----------|
| Home                        | 46<br>(9.2%)                           | 69<br>(13.6%)                          | 0.052    |
| Restaurant                  | 310<br>(61.8%)                         | 313<br>(61.9%)                         |          |
| School                      | 86<br>(17.1%)                          | 68<br>(13.4%)                          |          |
| Office                      | 15<br>(3%)                             | 19<br>(3.8%)                           |          |
| Hospital                    | 7<br>(1.4%)                            | 1<br>(0.2%)                            |          |
| Transportation vehicles     | 0<br>(0%)                              | 0<br>(0%)                              |          |
| Military facilities         | 3<br>(0.6%)                            | 8<br>(1.6%)                            |          |
| Outdoor                     | 5<br>(1%)                              | 2<br>(0.4%)                            |          |
| Vendors                     | 16<br>(3.2%)                           | 7<br>(1.4%)                            |          |
| Exterior                    | 2<br>(0.4%)                            | 2<br>(0.4%)                            |          |
| Prison                      | 3<br>(0.6%)                            | 6<br>(1.2%)                            |          |
| Social welfare organization | 6<br>(1.2%)                            | 4<br>(0.8%)                            |          |
| Others                      | 7<br>(1.4%)                            | 7<br>(1.4%)                            |          |

\**p*<0.05; FBD: foodborne disease

Table S2. The food source of foodborne diseases from 2019 to 2020 in Taiwan

| Food media                                               | 2019<br>FBD<br>events<br>(45) | 2020<br>FBD<br>events<br>(37) | <i>p</i> |
|----------------------------------------------------------|-------------------------------|-------------------------------|----------|
| Seafood                                                  | 11                            | 4                             | 0.075    |
| Aquatic processing                                       | 2                             | 0                             |          |
| Meat and processed<br>meat products                      | 3                             | 1                             |          |
| Eggs and processed<br>egg products                       | 2                             | 0                             |          |
| Cereals and processed<br>cereal products                 | 0                             | 1                             |          |
| Fruits and vegetables<br>and their processed<br>products | 5                             | 5                             |          |
| Cakes, candy                                             | 1                             | 2                             |          |
| Boxed meals                                              | 22                            | 19                            |          |
| Compounded foods                                         | 3                             | 5                             |          |
| Others                                                   | 1                             | 1                             |          |

\* $p < 0.05$ ; FBD: foodborne disease

There was 1 event involving aquatic products and compound prepared foods. There was 1 event involving processed aquatic products and boxed meals. There was 1 event involving meat and its processed products and fruits and vegetables and their processed products. There was 1 event involving boxed meals and other foods. There was 1 event involving meat and its processed products and boxed meals.

Table S3. The events about causes of foodborne diseases from 2019 to 2020 in Taiwan.

|                                                        | 2019                     | 2020                     |        |
|--------------------------------------------------------|--------------------------|--------------------------|--------|
| Bacterial causes                                       | FBD<br>events<br>(n=502) | FBD<br>events<br>(n=506) | p      |
| Bacteria                                               | 91                       | 80                       | 0.037* |
| <i>Vibrio vulnificus</i>                               | 10                       | 18                       |        |
| <i>Salmonella</i>                                      | 21                       | 26                       |        |
| Enteropathogen<br>ic <i>Escherichia</i><br><i>coli</i> | 3                        | 1                        |        |
| <i>Staphylococcus</i><br><i>aureus</i>                 | 35                       | 17                       |        |
| <i>Bacillus Cereus</i>                                 | 33                       | 22                       |        |
| Botox                                                  | 0                        | 1                        |        |
| <i>Clostridium</i><br><i>perfringens</i>               | 2                        | 0                        |        |
| Virus                                                  | 142                      | 122                      | 0.653  |
| Norovirus                                              | 140                      | 121                      |        |
| rotavirus                                              | 2                        | 1                        |        |
| Natural toxin                                          | 12                       | 10                       | 0.118  |
| Plant                                                  | 2                        | 4                        |        |
| Histamine                                              | 8                        | 4                        |        |
| Puffer poison                                          | 0                        | 2                        |        |
| Others                                                 | 2                        | 0                        |        |
| Unknow                                                 | 290                      | 294                      |        |

\* $p < 0.05$ ; FBD: foodborne disease.

A total of 29 events were caused by combined bacteria and viruses. There were 2 events caused by combined bacteria and natural poisons. There was 1 event caused by combined viruses and natural poisons.
